# Supplementary material
Source: MDPI journal article supplement (https://www.mdpi.com/2076-3417/7/3/226)
Supplement: s1 [file s1]

Archive with 2 entries (2 files):
- Software.zip
- applsci-170992-supplementary.pdf
